# Supplementary material
Source: PubMed Central journal article supplement (PMC5988355)
Supplement: NIHMS960351-supplement-2.pdf [file NIHMS960351-supplement-2.pdf]

## Supplementary Materials for

### **Aberrant Rac1-cofilin signaling mediates defects in dendritic spines, synaptic function, and sensory perception in fragile X syndrome**

Alexander Pyronneau, Qionger He, Jee-Yeon Hwang, Morgan Porch,  
Anis Contractor, R. Suzanne Zukin\*

\*Corresponding author. Email: [suzanne.zukin@einstein.yu.edu](mailto:suzanne.zukin@einstein.yu.edu)

Published 7 November 2017, *Sci. Signal.* **10**, eaan0852 (2017)  
DOI: 10.1126/scisignal.aan0852

#### **This PDF file includes:**

- Fig. S1. Validation of somatosensory cortex synapse enrichment.
- Fig. S2. Subcutaneous administration of hydroxypropyl- $\beta$ -cyclodextrin (vehicle) has little to no effect on cofilin signaling.
- Fig. S3. Mature *Fmr1* KO mice exhibit normal Rac1 signaling at somatosensory cortex synapses.
- Fig. S4. Mature *Fmr1* KO mice exhibit normal cofilin phosphorylation and activity at somatosensory cortex synapses.
- Table S1. Summary of statistics for Fig. 1.
- Table S2. Summary of statistics for Fig. 2.
- Table S3. Summary of statistics for Fig. 3.
- Table S4. Summary of statistics for Fig. 4.
- Table S5. Summary of statistics for Fig. 5.
- Table S6. Summary of statistics for Fig. 6.
- Table S7. Summary of statistics for fig. S2.
- Table S8. Summary of statistics for figs. S3 and S4.

### Somatosensory Cortex Synaptosomes (1wk)

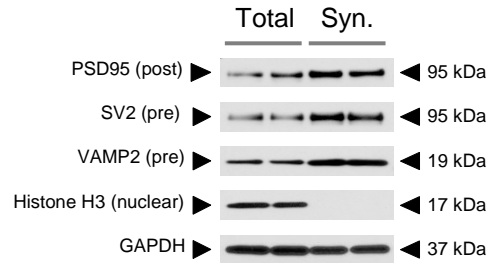

**Figure S1. Validation of somatosensory cortex synapse enrichment.** Representative western blot from a 1-week-old wild-type (WT) mouse showing enrichment of presynaptic (VAMP2 and SV2) and postsynaptic (PSD95) markers as well the absence of a nuclear marker (Histone H3) in somatosensory cortex synaptosome fractions versus total lysates.

### Synaptosomes (1 - 2 months)

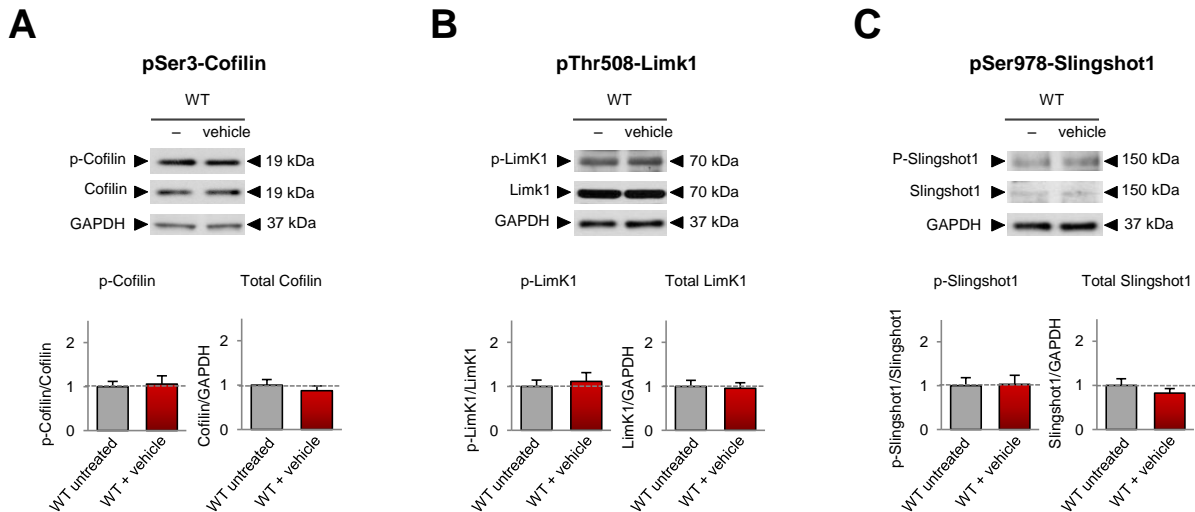

**Figure S2. Subcutaneous administration of hydroxypropyl- $\beta$ -cyclodextrin (vehicle) has little to no effect on cofilin signaling.** (A to C) Representative Western blots (top) and summary data (bottom) from somatosensory synaptosomes of 1- to 2-month-old wild-type mice, either untreated (left) or treated with hydroxypropyl- $\beta$ -cyclodextrin (vehicle; right). Synaptosomes from vehicle-treated animals exhibited no change in the abundance of phosphorylated (p-) cofilin (A), p-LIMK1 (B), and p-Slingshot1 (C) relative to those from untreated animals ( $n = 7$  animals per group).

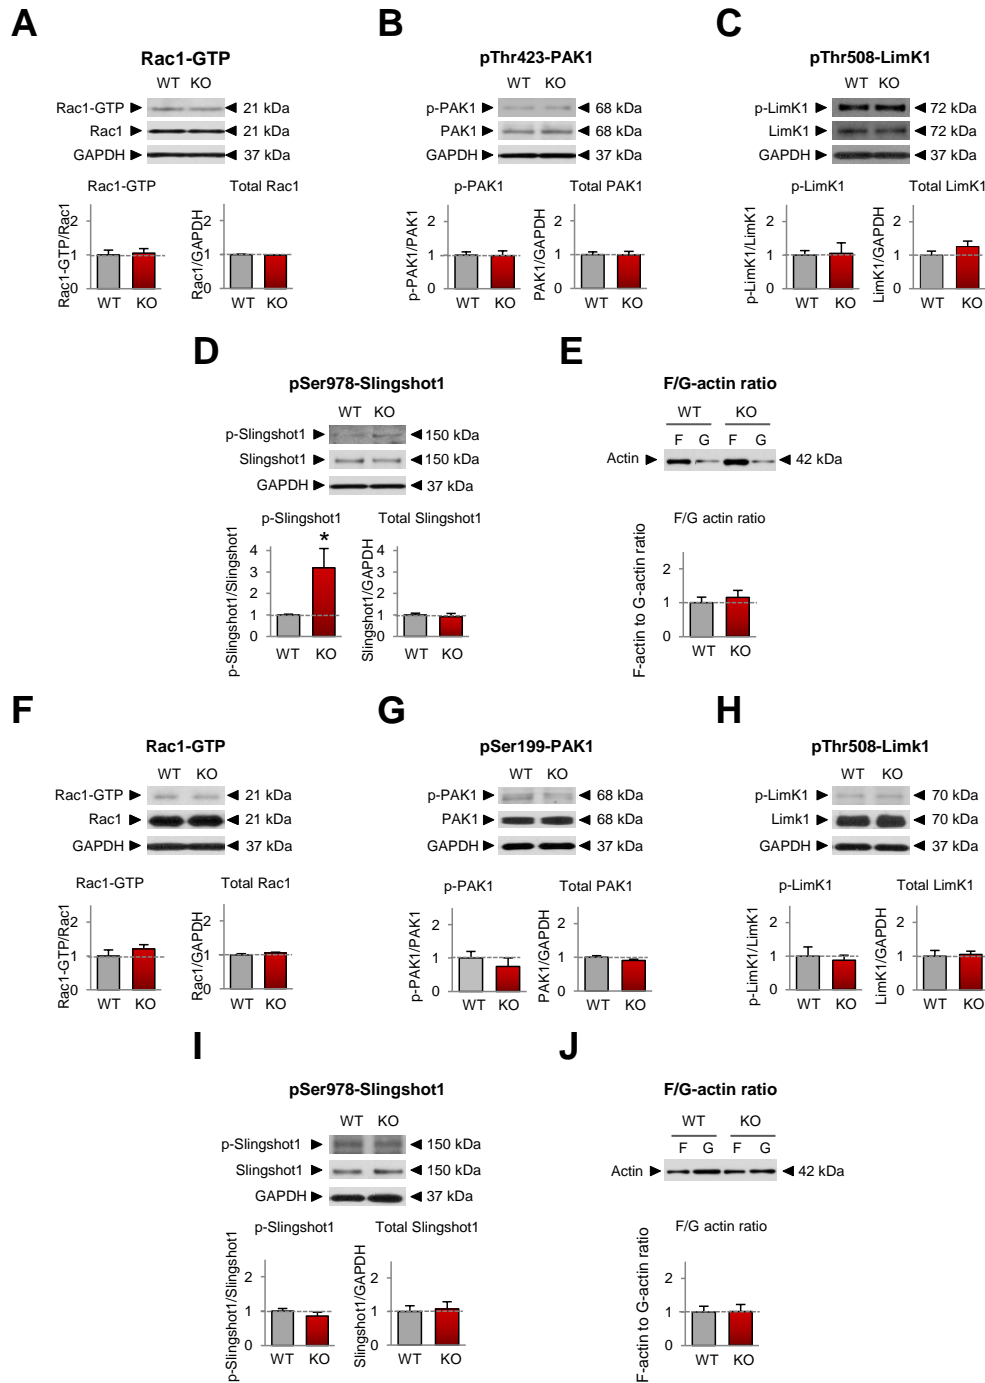

**Figure S3. Mature *Fmr1* KO mice exhibit normal Rac1 signaling at somatosensory cortex synapses.** (A to E) Representative Western blots (top) and summary data (bottom) from somatosensory lysates (A) or synaptosomes (B to E) of 4-week-old WT and *Fmr1* KO mice showing relative abundance of active, phosphorylated or total proteins in the Rac1 signaling pathway: (A) Rac1-GTP, (B) p-PAK1, (C) p-LIMK1, (D) p-Slingshot1, and (E) F-actin/G-actin ratio ( $n = 5 - 12$  animals per group). (F to J) Representative western blots (top) and summary data (bottom) from somatosensory lysates (F) or synaptosomes (G to J) of 2- to 5-month-old WT and *Fmr1* KO mice showing relative abundance of active, phosphorylated or total proteins in the Rac1 signaling pathway, as in (A to E) ( $n = 4 - 10$  animals per group). Data are mean  $\pm$  SEM. \* $p < 0.05$ .

## Synaptosomes (2 - 5 months)

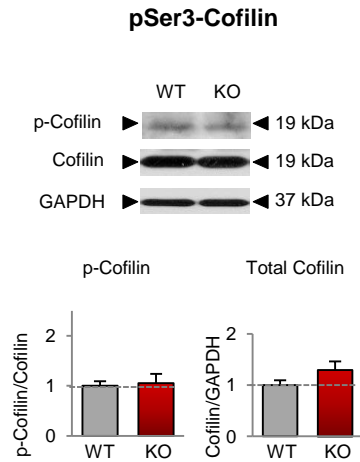

**Figure S4. Mature *Fmr1* KO mice exhibit normal cofilin phosphorylation and activity at somatosensory cortex synapses.** (A) Representative Western blots and summary data of cofilin phosphorylation in somatosensory synaptosomes from 2- to 5-month-old WT and *Fmr1* KO mice (9 – 14 mice per group). Membranes were probed with antibodies to p-cofilin and total cofilin.

**Table S1. Summary of statistics for Fig. 1.**

| Figure                  | N                                                                                                                  | Mean $\pm$ SEM                         | p value        | Statistical Test                             |
|-------------------------|--------------------------------------------------------------------------------------------------------------------|----------------------------------------|----------------|----------------------------------------------|
| <b>1A</b>               | WT (p-Cofilin) = 12 animals                                                                                        | 1.000 $\pm$ 0.2277                     | –              | Two-tailed unpaired <i>t</i> -test, WT vs KO |
|                         | KO (p-Cofilin) = 12 animals                                                                                        | 1.764 $\pm$ 0.2814                     | *, 0.046       |                                              |
|                         | WT (Cofilin) = 12 animals                                                                                          | 1.000 $\pm$ 0.05896                    | –              |                                              |
|                         | KO (Cofilin) = 12 animals                                                                                          | 1.080 $\pm$ 0.05266                    | 0.327          |                                              |
| <b>1B</b>               | WT (p-Cofilin) = 7 animals                                                                                         | 1.000 $\pm$ 0.1544                     | –              |                                              |
|                         | KO (p-Cofilin) = 7 animals                                                                                         | 1.115 $\pm$ 0.2765                     | 0.729          |                                              |
|                         | WT (Cofilin) = 7 animals                                                                                           | 1.000 $\pm$ 0.1190                     | –              |                                              |
|                         | KO (Cofilin) = 7 animals                                                                                           | 0.9104 $\pm$ 0.1131                    | 0.5952         |                                              |
| <b>1C</b>               | WT (p-Cofilin) = 12 animals                                                                                        | 1.000 $\pm$ 0.1458                     | –              |                                              |
|                         | KO (p-Cofilin) = 10 animals                                                                                        | 1.958 $\pm$ 0.4158                     | *, 0.030       |                                              |
|                         | WT (Cofilin) = 12 animals                                                                                          | 1.000 $\pm$ 0.0918                     | –              |                                              |
|                         | KO (Cofilin) = 10 animals                                                                                          | 0.7626 $\pm$ 0.0823                    | 0.073          |                                              |
| <b>1D</b>               | WT (p-Cofilin) = 10 animals                                                                                        | 1.000 $\pm$ 0.1355                     | –              |                                              |
|                         | KO (p-Cofilin) = 9 animals                                                                                         | 1.035 $\pm$ 0.2629                     | 0.9038         |                                              |
|                         | WT (Cofilin) = 10 animals                                                                                          | 1.000 $\pm$ 0.1106                     | –              |                                              |
|                         | KO (Cofilin) = 9 animals                                                                                           | 1.087 $\pm$ 0.1015                     | 0.5710         |                                              |
| <b>1E</b>               | WT (F/G actin) = 5 animals                                                                                         | 1.000 $\pm$ 0.4336                     | –              |                                              |
|                         | KO (F/G actin) = 6 animals                                                                                         | 3.495 $\pm$ 0.7284                     | *, 0.021       |                                              |
| <b>1G (% Filopodia)</b> | WT = 3 animals / 12 dendrites                                                                                      | 100.0 $\pm$ 4.957                      | –              |                                              |
|                         | KO = 3 animals / 13 dendrites                                                                                      | 126.2 $\pm$ 5.838                      | ***, 0.0009    |                                              |
| <b>1G (% Density)</b>   | WT = 3 animals / 12 dendrites, 154 segments, 660 spines<br>KO = 3 animals / 13 dendrites, 182 segments, 933 spines | 100.0 $\pm$ 7.941<br>131.1 $\pm$ 11.82 | –<br>*, 0.0429 |                                              |

**Table S2. Summary of statistics for Fig. 2.**

| Figure    | N                         | Mean $\pm$ SEM      | p value       | Statistical Test                             |
|-----------|---------------------------|---------------------|---------------|----------------------------------------------|
| <b>2A</b> | WT (Rac1-GTP) = 4 animals | 1.000 $\pm$ 0.0396  | –             | Two-tailed unpaired <i>t</i> -test, WT vs KO |
|           | KO (Rac1-GTP) = 4 animals | 1.673 $\pm$ 0.0396  | ****, <0.0001 |                                              |
|           | WT (Rac1) = 4 animals     | 1.000 $\pm$ 0.0327  | –             |                                              |
|           | KO (Rac1) = 4 animals     | 1.065 $\pm$ 0.0320  | 0.207         |                                              |
| <b>2B</b> | WT (p-PAK1) = 12 animals  | 1.000 $\pm$ 0.0904  | –             |                                              |
|           | KO (p-PAK1) = 15 animals  | 1.791 $\pm$ 0.3295  | *, 0.047      |                                              |
|           | WT (PAK1) = 12 animals    | 1.000 $\pm$ 0.0865  | –             |                                              |
|           | KO (PAK1) = 15 animals    | 1.109 $\pm$ 0.1615  | 0.327         |                                              |
| <b>2C</b> | WT (p-PAK4) = 8 animals   | 1.000 $\pm$ 0.1862  | –             |                                              |
|           | KO (p-PAK4) = 7 animals   | 1.133 $\pm$ 0.3728  | 0.745         |                                              |
|           | WT (PAK4) = 8 animals     | 1.000 $\pm$ 0.1111  | –             |                                              |
|           | KO (PAK4) = 7 animals     | 1.126 $\pm$ 0.1913  | 0.567         |                                              |
| <b>2D</b> | WT (p-LimK1) = 10 animals | 1.000 $\pm$ 0.0929  | –             |                                              |
|           | KO (p-LimK1) = 9 animals  | 2.047 $\pm$ 0.4434  | *, 0.020      |                                              |
|           | WT (LimK1) = 10 animals   | 1.000 $\pm$ 0.0730  | –             |                                              |
|           | KO (LimK1) = 9 animals    | 0.9765 $\pm$ 0.1525 | 0.887         |                                              |
| <b>2E</b> | WT (p-SSH1) = 8 animals   | 1.000 $\pm$ 0.1109  | –             |                                              |
|           | KO (p-SSH1) = 5 animals   | 1.764 $\pm$ 0.3759  | *, 0.037      |                                              |
|           | WT (SSH1) = 8 animals     | 1.000 $\pm$ 0.1424  | –             |                                              |
|           | KO (SSH1) = 5 animals     | 1.148 $\pm$ 0.3567  | 0.673         |                                              |

**Table S3. Summary of statistics for Fig. 3.**

| Figure    | N                                   | Mean ± SEM      | p value (p < 0.05) | Statistical Test                                                                                                       |
|-----------|-------------------------------------|-----------------|--------------------|------------------------------------------------------------------------------------------------------------------------|
| <b>3A</b> | WT vehicle (p-LimK1) = 13 animals   | 1.000 ± 0.2463  | –                  | Two-way ANOVA with Tukey's post-test (WT vehicle vs KO vehicle, WT vehicle vs WT FRAX486 and KO vehicle vs KO FRAX486) |
|           | KO vehicle (p-LimK1) = 12 animals   | 2.1853 ± 0.3478 | *, 0.012           |                                                                                                                        |
|           | WT FRAX486 (p-LimK1) = 13 animals   | 0.9886 ± 0.2433 | 0.999              |                                                                                                                        |
|           | KO FRAX486 (p-LimK1) = 11 animals   | 0.9751 ± 0.1843 | *, 0.016           |                                                                                                                        |
|           | WT vehicle (LimK1) = 13 animals     | 1.000 ± 0.1247  | –                  |                                                                                                                        |
|           | KO vehicle (LimK1) = 12 animals     | 0.9795 ± 0.1466 | 0.999              |                                                                                                                        |
|           | WT FRAX486 (LimK1) = 13 animals     | 1.0094 ± 0.1750 | 0.999              |                                                                                                                        |
|           | KO FRAX486 (LimK1) = 11 animals     | 1.1066 ± 0.2149 | 0.953              |                                                                                                                        |
| <b>3B</b> | WT vehicle (p-SSH1) = 12 animals    | 1.000 ± 0.3312  | –                  |                                                                                                                        |
|           | KO vehicle (p-SSH1) = 10 animals    | 2.3299 ± 0.2033 | **, 0.003          |                                                                                                                        |
|           | WT FRAX486 (p-SSH1) = 8 animals     | 1.3092 ± 0.2307 | 0.847              |                                                                                                                        |
|           | KO FRAX486 (p-SSH1) = 10 animals    | 1.1526 ± 0.2792 | *, 0.013           |                                                                                                                        |
|           | WT vehicle (SSH1) = 12 animals      | 1.000 ± 0.3930  | –                  |                                                                                                                        |
|           | KO vehicle (SSH1) = 10 animals      | 0.8570 ± 0.3334 | 0.986              |                                                                                                                        |
|           | WT FRAX486 (SSH1) = 8 animals       | 0.7212 ± 0.1630 | 0.910              |                                                                                                                        |
|           | KO FRAX486 (SSH1) = 10 animals      | 0.7692 ± 0.1949 | 0.999              |                                                                                                                        |
| <b>3C</b> | WT vehicle (p-Cofilin) = 14 animals | 1.0000 ± 0.2270 | –                  |                                                                                                                        |
|           | KO vehicle (p-Cofilin) = 14 animals | 2.0817 ± 0.2463 | **, 0.006          |                                                                                                                        |
|           | WT FRAX486 (p-Cofilin) = 15 animals | 0.9440 ± 0.2045 | 0.998              |                                                                                                                        |
|           | KO FRAX486 (p-Cofilin) = 9 animals  | 0.7251 ± 0.2293 | **, 0.002          |                                                                                                                        |
|           | WT vehicle (Cofilin) = 14 animals   | 1.0000 ± 0.2013 | –                  |                                                                                                                        |
|           | KO vehicle (Cofilin) = 14 animals   | 1.0703 ± 0.2069 | 0.995              |                                                                                                                        |
|           | WT FRAX486 (Cofilin) = 15 animals   | 0.8696 ± 0.1850 | 0.966              |                                                                                                                        |
|           | KO FRAX486 (Cofilin) = 9 animals    | 1.0339 ± 0.2354 | 0.999              |                                                                                                                        |
| <b>3D</b> | WT vehicle (F/G actin) = 10 animals | 1.0000 ± 0.1430 | –                  |                                                                                                                        |
|           | KO vehicle (F/G actin) = 9 animals  | 1.9193 ± 0.3043 | *, 0.012           |                                                                                                                        |
|           | WT FRAX486 (F/G actin) = 10 animals | 1.0028 ± 0.1529 | 0.999              |                                                                                                                        |
|           | KO FRAX486 (F/G actin) = 7 animals  | 1.0919 ± 0.1543 | *, 0.048           |                                                                                                                        |

**Table S4. Summary of statistics for Fig. 4.**

| Figure                             | N                                                                                                                                                                                                                                                                                                                                                                                                                                                    | Mean ± SEM                                                                                                     | p value (p < 0.05)                                                     | Statistical Test                                                                                                                                                       |
|------------------------------------|------------------------------------------------------------------------------------------------------------------------------------------------------------------------------------------------------------------------------------------------------------------------------------------------------------------------------------------------------------------------------------------------------------------------------------------------------|----------------------------------------------------------------------------------------------------------------|------------------------------------------------------------------------|------------------------------------------------------------------------------------------------------------------------------------------------------------------------|
| <b>4B<br/>(cultured neurons)</b>   | <i>3 independent experiments</i><br>No virus (F/G actin) = 14 wells<br>GFP (F/G actin) = 13 wells<br>WT-Cofilin (F/G actin) = 15 wells<br>Cofilin S3A (F/G actin) = 13 wells<br>Cofilin S3D (F/G actin) = 15 wells                                                                                                                                                                                                                                   | 1.0000 ± 0.1266<br>1.1017 ± 0.1602<br>0.9950 ± 0.1625<br>0.4280 ± 0.0750<br>1.0938 ± 0.1421                    | –<br>0.986<br>0.998<br>*, 0.042<br>0.988                               | One-way ANOVA with Tukey's post-test (No virus vs Cofilin S3A, No virus vs GFP, No virus vs Cofilin S3A, No virus vs Cofilin S3D)                                      |
| <b>4D<br/>(Spine length)</b>       | WT (GFP) = 10 animals, 21 neurons, 1286 spines, 196 segments of 10 µm<br>KO (GFP) = 8 animals, 20 neurons, 1381 spines, 170 segments of 10 µm<br>WT (WT. Cof.) = 7 animals, 15 neurons, 765 spines, 119 segments of 10 µm<br>KO (WT. Cof.) = 9 animals, 15 neurons, 911 spines, 123 segments of 10 µm<br>WT (S3A) = 6 animals, 16 neurons, 887 spines, 132 segments of 10 µm<br>KO (S3A) = 7 animals, 17 neurons, 1119 spines, 151 segments of 10 µm | 1.1442 ± 0.0532<br>1.3326 ± 0.0494<br>1.0087 ± 0.0403<br>1.2496 ± 0.0519<br>0.9462 ± 0.0364<br>0.9298 ± 0.0520 | –<br>*, 0.043<br>0.370<br>*, 0.019<br>*, 0.047<br>****, <0.0001        | Two-way ANOVA with Tukey's post-test (WT (GFP) vs KO (GFP), WT (GFP) vs WT (S3A), WT (GFP) vs WT (WT. Cof.), KO (GFP) vs KO (S3A), and WT (WT. Cof.) vs KO (WT. Cof.)) |
| <b>4E<br/>(Spine head width)</b>   | WT (GFP) – same as above<br>KO (GFP)<br>WT (WT. Cof.)<br>KO (WT. Cof.)<br>WT (S3A)<br>KO (S3A)                                                                                                                                                                                                                                                                                                                                                       | 0.7354 ± 0.0129<br>0.6509 ± 0.0221<br>0.6911 ± 0.0139<br>0.6046 ± 0.0146<br>0.7188 ± 0.0249<br>0.6356 ± 0.0191 | –<br>**, 0.009<br>0.541<br>*, 0.033<br>0.987<br>*, 0.031               |                                                                                                                                                                        |
| <b>4F<br/>(Length-width ratio)</b> | WT (GFP) – same as above<br>KO (GFP)<br>WT (WT. Cof.)<br>KO (WT. Cof.)<br>WT (S3A)<br>KO (S3A)                                                                                                                                                                                                                                                                                                                                                       | 1.6570 ± 0.0709<br>2.2756 ± 0.0868<br>1.6022 ± 0.0709<br>2.2876 ± 0.1141<br>1.4411 ± 0.0607<br>1.5550 ± 0.0773 | –<br>****, <0.0001<br>0.899<br>****, <0.0001<br>0.398<br>****, <0.0001 |                                                                                                                                                                        |
| <b>4G<br/>(%Stubby/Mushroom)</b>   | WT (GFP) – same as above<br>KO (GFP)<br>WT (WT. Cof.)<br>KO (WT. Cof.)<br>WT (S3A)<br>KO (S3A)                                                                                                                                                                                                                                                                                                                                                       | 0.7823 ± 0.0204<br>0.6568 ± 0.0177<br>0.7892 ± 0.0193<br>0.6106 ± 0.0218<br>0.8405 ± 0.0136<br>0.8109 ± 0.0222 | –<br>****, <0.0001<br>0.999<br>****, <0.0001<br>0.269<br>****, <0.0001 |                                                                                                                                                                        |
| <b>4H<br/>(%Thin/Filopodia)</b>    | WT (GFP) – same as above<br>KO (GFP)<br>WT (WT. Cof.)<br>KO (WT. Cof.)<br>WT (S3A)<br>KO (S3A)                                                                                                                                                                                                                                                                                                                                                       | 0.2127 ± 0.0201<br>0.3417 ± 0.0175<br>0.2108 ± 0.0193<br>0.3881 ± 0.0220<br>0.1595 ± 0.0136<br>0.1808 ± 0.0214 | –<br>****, <0.0001<br>0.999<br>****, <0.0001<br>0.355<br>****, <0.0001 |                                                                                                                                                                        |
| <b>4I<br/>(Spine density)</b>      | WT (GFP) – same as above<br>KO (GFP)<br>WT (WT. Cof.)<br>KO (WT. Cof.)<br>WT (S3A)<br>KO (S3A)                                                                                                                                                                                                                                                                                                                                                       | 6.8827 ± 0.3208<br>8.1235 ± 0.3485<br>6.1092 ± 0.3035<br>8.3008 ± 0.3801<br>6.7197 ± 0.3395<br>6.5762 ± 0.2974 | –<br>*, 0.046<br>0.583<br>***, 0.0005<br>0.999<br>**, 0.009            |                                                                                                                                                                        |

**Table S5. Summary of statistics for Fig. 5.**

| Figure                          | N                       | Mean ± SEM    | p value (p < 0.05) | Statistical Test                                                                                                    |
|---------------------------------|-------------------------|---------------|--------------------|---------------------------------------------------------------------------------------------------------------------|
| <b>5B</b><br>(NMDA/AM PA ratio) | WT vehicle = 13 animals | 0.669 ± 0.054 | –                  | Two-way ANOVA with Tukey's post-test (WT vehicle vs. KO vehicle, KO FRAX486)                                        |
|                                 | KO vehicle = 11 animals | 1.531 ± 0.288 | ** , 0.0014        |                                                                                                                     |
|                                 | WT FRAX486 = 11 animals | 0.727 ± 0.042 | –                  |                                                                                                                     |
|                                 | KO FRAX486 = 6 animals  | 0.503 ± 0.710 | 0.8297             |                                                                                                                     |
| <b>5D</b><br>(mEPSC amplitude)  | WT vehicle = 10 animals | 25.65 ± 2.273 | –                  |                                                                                                                     |
|                                 | KO vehicle = 10 animals | 21.60 ± 1.317 | 0.4386             |                                                                                                                     |
|                                 | WT FRAX486 = 11 animals | 26.28 ± 1.369 | –                  |                                                                                                                     |
|                                 | KO FRAX486 = 9 animals  | 29.36 ± 2.521 | * , 0.0365         |                                                                                                                     |
| <b>5D</b><br>(mEPSC frequency)  | WT vehicle = 10 animals | 1.014 ± 0.131 | –                  | Two-way ANOVA with Tukey's post-test (WT vehicle vs KO vehicle, WT vehicle vs WT FRAX486, KO vehicle vs KO FRAX486) |
|                                 | KO vehicle = 10 animals | 0.650 ± 0.095 | 0.1577             |                                                                                                                     |
|                                 | WT FRAX486 = 11 animals | 0.471 ± 0.111 | * , 0.0119         |                                                                                                                     |
|                                 | KO FRAX486 = 9 animals  | 0.655 ± 0.141 | 0.9999             |                                                                                                                     |
| <b>5E</b><br>(NMDA/AM PA ratio) | WT vehicle = 15 animals | 0.606 ± 0.068 | –                  |                                                                                                                     |
|                                 | KO vehicle = 7 animals  | 0.431 ± 0.065 | 0.3704             |                                                                                                                     |
|                                 | WT FRAX486 = 11 animals | 0.571 ± 0.048 | 0.9821             |                                                                                                                     |
|                                 | KO FRAX486 = 10 animals | 0.599 ± 0.089 | 0.4678             |                                                                                                                     |
| <b>5E</b><br>(mEPSC amplitude)  | WT vehicle = 18 animals | 29.21 ± 1.273 | –                  |                                                                                                                     |
|                                 | KO vehicle = 7 animals  | 27.79 ± 1.251 | 0.9301             |                                                                                                                     |
|                                 | WT FRAX486 = 16 animals | 22.67 ± 1.379 | ** , 0.004         |                                                                                                                     |
|                                 | KO FRAX486 = 12 animals | 22.14 ± 1.635 | 0.1254             |                                                                                                                     |
| <b>5E</b><br>(mEPSC frequency)  | WT vehicle = 18 animals | 2.472 ± 0.426 | –                  |                                                                                                                     |
|                                 | KO vehicle = 7 animals  | 2.454 ± 0.212 | 0.9999             |                                                                                                                     |
|                                 | WT FRAX486 = 16 animals | 2.873 ± 0.761 | 0.9452             |                                                                                                                     |
|                                 | KO FRAX486 = 12 animals | 1.920 ± 0.391 | 0.9505             |                                                                                                                     |

**Table S6. Summary of statistics for Fig. 6.**

| Figure    | N                                   | Mean ± SEM    | p value (p < 0.05) | Statistical Test                                                                                  |
|-----------|-------------------------------------|---------------|--------------------|---------------------------------------------------------------------------------------------------|
| <b>6B</b> | WT (familiar) = 13 animals          | 42.05 ± 3.276 | –                  | Two-tailed unpaired <i>t</i> test for WT (familiar) vs WT (novel) and KO (familiar) vs KO (novel) |
|           | WT (novel) = 13 animals             | 58.96 ± 2.663 | *** , 0.0005       |                                                                                                   |
|           | KO (familiar) = 7 animals           | 48.54 ± 4.097 | –                  |                                                                                                   |
|           | KO (novel) = 7 animals              | 51.46 ± 4.097 | 0.6259             |                                                                                                   |
| <b>6C</b> | WT (familiar) = 10 animals          | 47.50 ± 2.435 | –                  |                                                                                                   |
|           | WT (novel) = 10 animals             | 52.60 ± 2.449 | 0.1569             |                                                                                                   |
| <b>6D</b> | WT (familiar) = 7 animals           | 52.54 ± 4.100 | –                  |                                                                                                   |
|           | WT (novel) = 7 animals              | 47.46 ± 4.100 | 0.3989             |                                                                                                   |
| <b>6E</b> | WT (familiar) = 7 animals           | 38.13 ± 2.872 | –                  |                                                                                                   |
|           | WT (novel) = 7 animals              | 61.87 ± 2.872 | **** , <0.0001     |                                                                                                   |
|           | KO (familiar) = 8 animals           | 41.08 ± 3.631 | –                  |                                                                                                   |
|           | KO (novel) = 8 animals              | 58.92 ± 3.631 | ** , 0.003         |                                                                                                   |
| <b>6F</b> | WT-vehicle (familiar) = 15 animals  | 43.57 ± 2.705 | –                  |                                                                                                   |
|           | WT-vehicle (novel) = 15 animals     | 56.43 ± 2.705 | ** , 0.0022        |                                                                                                   |
|           | KO-vehicle (familiar) = 10 animals  | 51.79 ± 3.446 | –                  |                                                                                                   |
|           | KO-vehicle (novel) = 10 animals     | 48.71 ± 2.997 | 0.5089             |                                                                                                   |
|           | WT-FRAX486 (familiar) = 9 animals   | 41.44 ± 4.219 | –                  |                                                                                                   |
|           | WT- FRAX486 (novel) = 9 animals     | 58.83 ± 4.344 | * , 0.0111         |                                                                                                   |
|           | KO- FRAX486 (familiar) = 10 animals | 40.19 ± 3.188 | –                  |                                                                                                   |
|           | KO- FRAX486 (novel) = 10 animals    | 59.81 ± 3.188 | *** , 0.0003       |                                                                                                   |



**Table S7. Summary of statistics for fig. S2.**

| Figure          | N                                    | Mean ± SEM      | p value (p < 0.05) | Statistical Test                                                                 |
|-----------------|--------------------------------------|-----------------|--------------------|----------------------------------------------------------------------------------|
| <b>Supp. 2A</b> | WT untreated (p-Cofilin) = 7 animals | 1.000 ± 0.1259  | –                  | Two-tailed unpaired <i>t</i> test for WT untreated vs WT vehicle treated animals |
|                 | WT vehicle (p-Cofilin) = 7 animals   | 1.060 ± 0.2010  | 0.8031             |                                                                                  |
|                 | WT untreated (Cofilin) = 7 animals   | 1.000 ± 0.1360  | –                  |                                                                                  |
|                 | WT vehicle (Cofilin) = 7 animals     | 0.8786 ± 0.1109 | 0.5023             |                                                                                  |
| <b>Supp. 2B</b> | WT untreated (p-LimK1) = 7 animals   | 1.000 ± 0.1525  | –                  |                                                                                  |
|                 | WT vehicle (p-LimK1) = 7 animals     | 1.116 ± 0.2125  | 0.6659             |                                                                                  |
|                 | WT untreated (LimK1) = 7 animals     | 1.000 ± 0.1458  | –                  |                                                                                  |
|                 | WT vehicle (LimK1) = 7 animals       | 0.9594 ± 0.1327 | 0.8402             |                                                                                  |
| <b>Supp. 2C</b> | WT untreated (p-SSH1) = 7 animals    | 1.000 ± 0.1953  | –                  |                                                                                  |
|                 | WT vehicle (p-SSH1) = 7 animals      | 1.028 ± 0.2255  | 0.9270             |                                                                                  |
|                 | WT untreated (SSH1) = 7 animals      | 1.000 ± 0.1571  | –                  |                                                                                  |
|                 | WT vehicle (SSH1) = 7 animals        | 0.8207 ± 0.1127 | 0.3718             |                                                                                  |

**Table S8. Summary of statistics for figs. S3 and S4.**

| Figure    | N                          | Mean ± SEM      | p value   | Statistical Test                               |
|-----------|----------------------------|-----------------|-----------|------------------------------------------------|
| <b>3A</b> | WT (Rac1-GTP) = 8 animals  | 1.000 ± 0.1437  | –         | Two-tailed unpaired <i>t</i> test for WT vs KO |
|           | KO (Rac-GTP) = 7 animals   | 1.052 ± 0.1341  | 0.7984    |                                                |
|           | WT (Rac1) = 8 animals      | 1.000 ± 0.01174 | –         |                                                |
|           | KO (Rac1) = 7 animals      | 0.9846 ± 0.0082 | 0.3136    |                                                |
| <b>3B</b> | WT (p-PAK1) = 8 animals    | 1.000 ± 0.0937  | –         |                                                |
|           | KO (p-PAK1) = 8 animals    | 0.9798 ± 0.1460 | 0.9089    |                                                |
|           | WT (PAK1) = 8 animals      | 1.000 ± 0.0786  | –         |                                                |
|           | KO (PAK1) = 8 animals      | 0.9904 ± 0.1071 | 0.9435    |                                                |
| <b>3C</b> | WT (p-LIMK1) = 10 animals  | 1.000 ± 0.1349  | –         |                                                |
|           | KO (p-LIMK1) = 9 animals   | 1.050 ± 0.3280  | 0.8849    |                                                |
|           | WT (LIMK1) = 10 animals    | 1.000 ± 0.1205  | –         |                                                |
|           | KO (LIMK1) = 9 animals     | 1.253 ± 0.1664  | 0.2291    |                                                |
| <b>3D</b> | WT (p-SSH1) = 8 animals    | 1.000 ± 0.0716  | –         |                                                |
|           | KO (p-SSH1) = 7 animals    | 3.127 ± 0.9302  | *, 0.0293 |                                                |
|           | WT (SSH1) = 8 animals      | 1.000 ± 0.0795  | –         |                                                |
|           | KO (SSH1) = 7 animals      | 0.9207 ± 0.1603 | 0.6537    |                                                |
| <b>3E</b> | WT (F/G actin) = 5 animals | 1.000 ± 0.0543  | –         |                                                |
|           | KO (F/G actin) = 5 animals | 1.156 ± 0.1955  | 0.4592    |                                                |
| <b>3F</b> | WT (Rac1-GTP) = 7 animals  | 1.000 ± 0.1767  | –         |                                                |
|           | KO (Rac-GTP) = 5 animals   | 1.213 ± 0.1235  | 0.3944    |                                                |
|           | WT (Rac1) = 7 animals      | 1.000 ± 0.3615  | –         |                                                |
|           | KO (Rac1) = 5 animals      | 1.054 ± 0.0246  | 0.2852    |                                                |
| <b>3G</b> | WT (p-PAK1) = 4 animals    | 1.000 ± 0.2757  | –         |                                                |
|           | KO (p-PAK1) = 6 animals    | 0.7542 ± 0.2850 | 0.5723    |                                                |
|           | WT (PAK1) = 4 animals      | 1.000 ± 0.0708  | –         |                                                |
|           | KO (PAK1) = 6 animals      | 0.9089 ± 0.0372 | 0.2461    |                                                |
| <b>3H</b> | WT (p-LIMK1) = 8 animals   | 1.000 ± 0.2764  | –         |                                                |
|           | KO (p-LIMK1) = 5 animals   | 0.8735 ± 0.1535 | 0.7419    |                                                |
|           | WT (LIMK1) = 8 animals     | 1.000 ± 0.1722  | –         |                                                |
|           | KO (LIMK1) = 5 animals     | 1.055 ± 0.0918  | 0.8034    |                                                |
| <b>3I</b> | WT (p-SSH1) = 9 animals    | 1.000 ± 0.0783  | –         |                                                |
|           | KO (p-SSH1) = 7 animals    | 0.8557 ± 0.1082 | 0.2863    |                                                |
|           | WT (SSH1) = 9 animals      | 1.000 ± 0.1692  | –         |                                                |
|           | KO (SSH1) = 7 animals      | 1.079 ± 0.2167  | 0.7750    |                                                |

|           |                             |                    |        |  |
|-----------|-----------------------------|--------------------|--------|--|
| <b>3J</b> | WT (F/G actin) = 9 animals  | $1.000 \pm 0.1697$ | –      |  |
|           | KO (F/G actin) = 10 animals | $1.054 \pm 0.2098$ | 0.9599 |  |
| <b>4A</b> | WT (p-Cofilin) = 13 animals | $1.000 \pm 0.0925$ | –      |  |
|           | KO (p-Cofilin) = 9 animals  | $1.052 \pm 0.1864$ | 0.7860 |  |
|           | WT (Cofilin) = 13 animals   | $1.000 \pm 0.0933$ | –      |  |
|           | KO (Cofilin)= 9 animals     | $1.295 \pm 0.1668$ | 0.1097 |  |
